# Supplementary material
Source: ML conference proceedings conference paper supplement (https://openaccess.thecvf.com/content/CVPR2026/html/Lei_Tutor-Student_Reinforcement_Learning_CVPR_2026_paper.html)
Supplement: Supplementary file 1 [file 35361_supp.pdf › 35361_supp/35361_supp.pdf]

## Supplementary Material

### 1. Dataset and Implementation Details

The data preprocessing pipeline employed in this study relies primarily on the standardized framework provided by **DeepfakeBench** [7]. Utilizing this established benchmark ensures that our face extraction, alignment, and normalization procedures remain consistent with state-of-the-art methodologies, thereby facilitating fair comparison.

#### 1.1. Data Augmentation Protocols

To ensure robust generalization, we implemented a diverse augmentation pipeline using the Albumentations framework. Standard transformations include spatial perturbations (random flips, rotations) and visual degradations (image compression, Gaussian blur, color jittering) to simulate real-world variability. Crucially, to prevent the model from overfitting to specific sampling artifacts, we employed a randomized **Isotropic Resize** strategy that stochastically alternates between Bicubic, Bilinear, and Area interpolation kernels during training.

#### 1.2. Dataset Selection and Configuration

We constructed our training and evaluation corpora using the latest iterations of deepfake datasets as curated in Yan et al. [7, 8], in conjunction with the **DF40** dataset. To maintain temporal consistency across input samples, we enforced a fixed frame sampling strategy. Specifically, the hyperparameter defining the input sequence length was set to `num_frames = 32`. This configuration ensures that the model captures sufficient temporal artifacts without incurring excessive computational overhead.

#### 1.3. Integration with TSRL Architecture

To facilitate the specific state-tracking requirements of the Tutor-Student Reinforcement Learning (TSRL) framework, we developed a custom data interface adapter. While the standard benchmarking loaders provide robust image retrieval, they do not inherently preserve sample identifiers following the stochastic shuffling inherent to training pipelines. This limitation prevents the RL agent from accurately mapping rewards or curriculum adjustments back to specific training instances.

The implemented adapter resolves this by introducing a non-destructive metadata layer that ensures sample traceability through two primary mechanisms:

- **Sample Indexing:** The interface intercepts individual data samples retrieved from the underlying dataset and injects a unique global identifier into the sample structure. This ensures that every input instance retains a distinct tag regardless of its position in the training queue.

- **Batch-Level Aggregation:** During the construction of training batches, the adapter extracts these identifiers and aggregates them into a dedicated tracking vector. This vector is appended to the final batch output, allowing the TSRL algorithm to maintain a deterministic correspondence between the randomly sampled tensor data and the global training environment.

### 2. Further Results

In the primary analysis, the Area Under the Receiver Operating Characteristic Curve (AUC) was utilized to benchmark ranking performance independent of threshold selection. However, for practical deployment, the Accuracy (ACC) metric provides a vital complementary perspective by evaluating the model’s decision-making precision under a fixed classification boundary. Table 1 details the comparative performance across extensive cross-dataset and cross-method experimental settings. A holistic examination of these results reveals that the Tutor-Student Reinforcement Learning (TSRL) framework consistently enhances the discrimination capability of various baseline architectures.

In the cross-dataset evaluation, which challenges the models with unseen domain distributions, the TSRL-augmented detectors demonstrate notable stability, suggesting that the dynamic curriculum effectively prevents the learning of dataset-specific biases. Collectively, these accuracy metrics corroborate the AUC findings presented in the main text, confirming that the performance gains attributed to the adaptive curriculum are robust, metric-agnostic, and beneficial across varying testing conditions.

### 3. Formal Algorithmic Procedures

To facilitate reproducibility, we provide the formal procedural definitions for the Tutor-Student Reinforcement Learning (TSRL) training loop and the reward shaping mechanism.

#### Algorithm 1 Dense State-Change Reward Calculation

```

1: function CALCREWARD( $p_{old}, c_{old}, p_{new}, c_{new}$ )
2:    $\Delta_{conf} \leftarrow p_{new}[\text{target}] - p_{old}[\text{target}]$ 
3:   Initialize reward  $r \leftarrow 0$ 
4:   if  $c_{old} == \text{False}$  and  $c_{new} == \text{True}$  then
5:      $r \leftarrow 1.0$  ▷ Success
6:   else if  $c_{old} == \text{True}$  and  $c_{new} == \text{False}$  then
7:      $r \leftarrow -1.0$  ▷ Forgetting
8:   else if  $c_{old} == \text{True}$  and  $c_{new} == \text{True}$  then
9:      $r \leftarrow 0.5 \times \Delta_{conf}$  ▷ Gain/Loss
10:  else
11:     $r \leftarrow -0.5 \times \Delta_{conf}$  ▷ Penalty
12:  end if
13:  return  $r$ 
14: end function

```

Table 1. **Cross-dataset and cross-type generalization performance (Accuracy)** All models are trained on FF++ (c23) [5] and evaluated on the other datasets/fake data. Results from models trained with our TSRL are highlighted. † denotes models retrained by us;

| Methods                  | Cross-dataset Evaluation |              |              |              |              | Cross-method Evaluation |              |              |              |              |              |              |              |              |
|--------------------------|--------------------------|--------------|--------------|--------------|--------------|-------------------------|--------------|--------------|--------------|--------------|--------------|--------------|--------------|--------------|
|                          | CDF-v2                   | DFD          | DFDC         | DFDCP        | Avg.         | UniFace                 | BleFace      | MobSwap      | e4s          | FaceDan      | FSGAN        | InSwap       | SimSwap      | Avg.         |
| IID† [2]                 | 0.670                    | 0.832        | 0.673        | 0.622        | 0.699        | 0.717                   | 0.678        | 0.814        | 0.610        | 0.695        | 0.815        | 0.689        | 0.605        | 0.703        |
| <b>IID [2] + TSRL</b>    | <b>0.639</b>             | <b>0.792</b> | <b>0.625</b> | <b>0.642</b> | <b>0.675</b> | <b>0.679</b>            | <b>0.621</b> | <b>0.833</b> | <b>0.563</b> | <b>0.681</b> | <b>0.756</b> | <b>0.672</b> | <b>0.627</b> | <b>0.679</b> |
| CLIP† [4]                | 0.662                    | 0.692        | 0.673        | 0.622        | 0.662        | 0.554                   | 0.558        | 0.752        | 0.534        | 0.580        | 0.582        | 0.564        | 0.502        | 0.578        |
| <b>CLIP [4] + TSRL</b>   | <b>0.764</b>             | <b>0.884</b> | <b>0.650</b> | <b>0.696</b> | <b>0.749</b> | <b>0.554</b>            | <b>0.590</b> | <b>0.752</b> | <b>0.560</b> | <b>0.660</b> | <b>0.707</b> | <b>0.608</b> | <b>0.521</b> | <b>0.619</b> |
| CORE† [3]                | 0.689                    | 0.860        | 0.621        | 0.713        | 0.721        | 0.725                   | 0.713        | 0.825        | 0.600        | 0.648        | 0.837        | 0.718        | 0.580        | 0.706        |
| <b>CORE [3] + TSRL</b>   | <b>0.720</b>             | <b>0.813</b> | <b>0.629</b> | <b>0.673</b> | <b>0.709</b> | <b>0.815</b>            | <b>0.752</b> | <b>0.844</b> | <b>0.562</b> | <b>0.764</b> | <b>0.817</b> | <b>0.833</b> | <b>0.750</b> | <b>0.767</b> |
| UCF† [6]                 | 0.663                    | 0.754        | 0.655        | 0.594        | 0.667        | 0.691                   | 0.670        | 0.784        | 0.638        | 0.715        | 0.811        | 0.687        | 0.632        | 0.704        |
| <b>UCF [6] + TSRL</b>    | <b>0.632</b>             | <b>0.756</b> | <b>0.622</b> | <b>0.652</b> | <b>0.666</b> | <b>0.699</b>            | <b>0.680</b> | <b>0.799</b> | <b>0.679</b> | <b>0.693</b> | <b>0.774</b> | <b>0.718</b> | <b>0.662</b> | <b>0.713</b> |
| ProDet† [1]              | 0.783                    | 0.877        | 0.639        | 0.726        | 0.756        | 0.767                   | 0.792        | 0.914        | 0.676        | 0.626        | 0.794        | 0.716        | 0.717        | 0.750        |
| <b>ProDet [1] + TSRL</b> | <b>0.804</b>             | <b>0.856</b> | <b>0.622</b> | <b>0.760</b> | <b>0.761</b> | <b>0.757</b>            | <b>0.774</b> | <b>0.925</b> | <b>0.668</b> | <b>0.634</b> | <b>0.803</b> | <b>0.735</b> | <b>0.705</b> | <b>0.750</b> |
| Effort† [9]              | 0.783                    | 0.902        | 0.714        | 0.777        | 0.794        | 0.843                   | 0.729        | 0.827        | 0.827        | 0.800        | 0.818        | 0.806        | 0.771        | 0.803        |
| <b>Effort [9] + TSRL</b> | <b>0.764</b>             | <b>0.884</b> | <b>0.743</b> | <b>0.797</b> | <b>0.797</b> | <b>0.882</b>            | <b>0.779</b> | <b>0.854</b> | <b>0.906</b> | <b>0.854</b> | <b>0.875</b> | <b>0.849</b> | <b>0.796</b> | <b>0.849</b> |

082

### Algorithm 2 TSRL Training Procedure

**Require:** Student  $M_S$ , Tutor  $T_\pi$ , State Manager  $\mathcal{M}$ , Dataset  $\mathcal{D}$ , Epochs  $N$ , Warmup  $N_{\text{warm}}$

- 1: **Init:** Pre-train  $T_\pi$  via BC
- 2: **for** epoch  $e = 1$  to  $N$  **do**
- 3:   Init batch buffer  $\mathcal{B} \leftarrow \emptyset$
- 4:   **for** batch  $(x, y)$  in  $\mathcal{D}$  **do**
- 5:     **// 1: Pre-Update Obs.**
- 6:      $M_S.\text{eval}()$ ; Get  $z_{\text{old}}, p_{\text{old}}, f, c_{\text{old}}$
- 7:     Retrieve history  $\ell_{\text{ema}}, c_{\text{forget}}$  from  $\mathcal{M}$
- 8:      $s_t \leftarrow [f, p_{\text{old}}, c_{\text{old}}, \ell_{\text{ema}}, c_{\text{forget}}]$
- 9:     **// 2: Tutor Action**
- 10:    **if**  $e < N_{\text{warm}}$  **then**
- 11:      $w_t \leftarrow 1$  ▷ Supervision
- 12:    **else**
- 13:     Sample  $w_t \sim T_\pi(s_t)$
- 14:    **end if**
- 15:    **// 3: Weighted Update**
- 16:     $M_S.\text{train}()$ ;  $\mathcal{L} = \text{CE}(M_S(x), y)$
- 17:    Update  $\theta_S \leftarrow \theta_S - \eta \nabla(w_t \cdot \mathcal{L})$
- 18:    **// 4: Post-Update & Reward**
- 19:     $M_S.\text{eval}()$ ; Get  $p_{\text{new}}, c_{\text{new}}$
- 20:     $r_t \leftarrow \text{CALCREWARD}(\dots)$
- 21:    Update  $\mathcal{M}$ ; Store  $(s_t, w_t, r_t)$
- 22:    **end for**
- 23:    **// 5: Tutor Update**
- 24:    **if**  $e \geq N_{\text{warm}}$  **then**
- 25:     Update  $T_\pi$  (PPO) on  $\mathcal{B}$
- 26:     Clear buffer  $\mathcal{B}$
- 27:    **end if**
- 28: **end for**

083

### 3.1. TSRL Training Procedure Details

084

085

086

087

Algorithm 2 outlines the complete interaction loop between the Student detector ( $M_S$ ), the Tutor agent ( $T_\pi$ ), and the State Manager ( $\mathcal{M}$ ). A critical implementation detail is the *two-pass* evaluation performed at every step.

### 3.2. Reward Calculation Logic

The dense reward signal is computed for each sample individually. Algorithm 1 formalizes the logic used to quantify the "value" of a teaching action based on the immediate shift in the Student's decision boundary.

### References

- [1] Jikang Cheng, Zhiyuan Yan, Ying Zhang, Yuhao Luo, Zhongyuan Wang, and Chen Li. Can we leave deepfake data behind in training deepfake detector? In *Advances in Neural Information Processing Systems*, pages 21979–21998. Curran Associates, Inc., 2024. 2
- [2] Baojin Huang, Zhongyuan Wang, Jifan Yang, Jiaxin Ai, Qin Zou, Qian Wang, and Dengpan Ye. Implicit identity driven deepfake face swapping detection. In *CVPR*, pages 4490–4499, 2023. 2
- [3] Yunsheng Ni, Depu Meng, Changqian Yu, Chengbin Quan, Dongchun Ren, and Youjian Zhao. Core: Consistent representation learning for face forgery detection. In *CVPRW*, pages 12–21, 2022. 2
- [4] Alec Radford, Jong Wook Kim, Chris Hallacy, Aditya Ramesh, Gabriel Goh, Sandhini Agarwal, Girish Sastry, Amanda Askell, Pamela Mishkin, Jack Clark, et al. Learning transferable visual models from natural language supervision. In *International conference on machine learning*, pages 8748–8763, 2021. 2
- [5] Andreas Rossler, Davide Cozzolino, Luisa Verdoliva, Christian Riess, Justus Thies, and Matthias Nießner. FaceForensics++: Learning to detect manipulated facial images. In *Proceedings of the IEEE/CVF International Conference on Computer Vision*, pages 1–11. IEEE/CVF, 2019. 2
- [6] Zhiyuan Yan, Yong Zhang, Yanbo Fan, and Baoyuan Wu. Ucf: Uncovering common features for generalizable deepfake detection. In *Proceedings of the IEEE/CVF International Conference on Computer Vision (ICCV)*, pages 22412–22423, 2023. 2

- 122 [7] Zhiyuan Yan, Yong Zhang, Xinhang Yuan, Siwei Lyu, and  
123 Baoyuan Wu. Deepfakebench: A comprehensive benchmark  
124 of deepfake detection. In *Advances in Neural Information*  
125 *Processing Systems*, pages 4534–4565. Curran Associates, Inc.,  
126 2023. [1](#)
- 127 [8] Zhiyuan Yan, Taiping Yao, Shen Chen, Yandan Zhao, Xinghe  
128 Fu, Junwei Zhu, Donghao Luo, Chengjie Wang, Shouhong  
129 Ding, Yunsheng Wu, et al. Df40: Toward next-generation  
130 deepfake detection. *Advances in Neural Information Process-*  
131 *ing Systems*, 37:29387–29434, 2024. [1](#)
- 132 [9] Zhiyuan Yan, Jiangming Wang, Peng Jin, Ke-Yue Zhang,  
133 Chengchun Liu, Shen Chen, Taiping Yao, Shouhong Ding,  
134 Baoyuan Wu, and Li Yuan. Orthogonal subspace decomposi-  
135 tion for generalizable ai-generated image detection. In *Forty-*  
136 *second International Conference on Machine Learning*, 2025.  
137 [2](#)
